# Supplementary material
Source: publisher figshare collection journal article supplement (https://acs.figshare.com/ndownloader/files/35008433)
Supplement: Supplementary file 1 [file 35008433]

# Pressure-Induced Hydrogen Transfer in 2-Butyne via a Double CH $\cdots\pi$ Aromatic Transition State

*Peijie Zhang,<sup>1,▽</sup> Xingyu Tang,<sup>1,▽</sup> Chunfang Zhang,<sup>2</sup> Dexiang Gao,<sup>1</sup> Xuan Wang,<sup>1</sup> Yajie Wang,<sup>1</sup>  
Wenhan Guo,<sup>3</sup> Ruqiang Zou,<sup>4</sup> Yehua Han,<sup>5</sup> Xiaohuan Lin,<sup>1</sup> Xiao Dong,<sup>6</sup> Kuo Li,<sup>1</sup> Haiyan  
Zheng,<sup>1,\*</sup> Ho-kwang Mao<sup>1</sup>*

<sup>1</sup>Center for High Pressure Science and Technology Advanced Research, Beijing, 100094, P. R. China.

<sup>2</sup>College of Chemistry and Environmental Science, Hebei University, Baoding, 071002, P. R. China.

<sup>3</sup>Great Bay University, Dongguan, 523000, P. R. China.

<sup>4</sup>School of Materials Science and Engineering, Peking University, Beijing, 100871, P. R. China.

<sup>5</sup>State Key Laboratory of Heavy Oil Processing, College of Chemical Engineering and Environment, China University of Petroleum-Beijing, Beijing, 102249, P. R. China.

<sup>6</sup>Key Laboratory of Weak-Light Nonlinear Photonics, School of Physics, Nankai University, Tianjin, 300071, P. R. China.

<sup>▽</sup>P.Z. and X.T. contributed equally.

Corresponding Author: Haiyan Zheng Email: zhenghy@hpstar.ac.cn

## Table of Contents

### S1. Experimental procedures and calculation details

#### S1.1 In situ high-pressure Raman, IR, and X-ray diffraction experiments

#### S1.2 The synthesis of samples PE-20

#### S1.3 High-pressure single crystal X-ray diffraction experiment

#### S1.4 High-resolution Gas Chromatography Mass Spectrometry experiment

#### S1.5 Matrix-assisted Laser Desorption Ionization Time of Flight Mass Spectrometry experiment

#### S1.6 Density functional theory calculation

### S2. Supplementary figures and tables

### S3. Supplemental references

## S1. Experimental procedures and calculation details

### S1.1 In situ high-pressure Raman, IR, and X-ray diffraction experiments

2-Butyne ( $\text{C}_4\text{H}_6$ , 99.9%) was purchased from J&K Scientific Ltd and used without further purification. Our Raman and IR spectra as well as X-ray diffraction (XRD) were measured using a symmetric diamond anvil cell (DAC). Type-II diamond anvils were used for IR experiment to avoid absorption band at 1000-1300  $\text{cm}^{-1}$ . All diamonds were polished to a culet diameter of 300  $\mu\text{m}$ . T301 stainless steel gaskets were pre-indented to a thickness of  $\sim 30$   $\mu\text{m}$  and holes with  $d = 150$   $\mu\text{m}$  were drilled at the center of the indentation to serve as the sample chamber. In order to avoid the sample volatilization and possible big grains or preferred orientation, the whole DAC was cooled in liquid nitrogen environment firstly and sample (liquid) was frozen on the cold gasket, and then the DAC was sealed at low temperature. The pressure was determined by measuring the ruby fluorescence, according to the equation  $P \text{ (GPa)} = 248.4[(\lambda/\lambda_0)^{7.665} - 1]$ .<sup>1</sup> Raman experiments were carried out on a Renishaw Raman microscope with 532 nm laser line from a Nd:YAG laser source. The system was calibrated by the Raman peak of Si. IR experiments were performed on a Bruker VERTEX 70v with HYPERION 2000 microscope. The spectra were collected in transmission mode in the range of 600-4000  $\text{cm}^{-1}$  with a resolution of 4  $\text{cm}^{-1}$  through a  $20 \times 20$   $\mu\text{m}^2$  aperture. The synchrotron XRD data were collected at beamline 16 ID-B, Advanced Photon Source (APS), Argonne National Laboratory. The monochromated incident X-ray

wavelength is 0.4340 Å. The preliminary data reduction was performed by using the Dioptas program.<sup>2</sup> Rietveld refinement was performed for XRD data by using Jana 2006 software.<sup>3</sup>

### S1.2 Synthesis of sample PE-20

The sample PE-20 was synthesized using a VX3 Paris-Edinburgh press (PE Press) equipped with double-toroid sintered diamond anvils, with a sample volume of 16.8 mm<sup>3</sup>. The liquid 2-butyne was dropped into an encapsulated stainless-steel gasket under liquid N<sub>2</sub> temperature and frozen immediately. After the gasket was fully filled, the whole gasket sets containing the sample were moved into the VX3 PE press and the cell was closed in a few seconds. An automatic hydraulic oil syringe pump drove the system and the pressure was estimated from the Edinburgh group calibration curve.<sup>4</sup> In order to avoid sample leakage, the oil pressure was quickly increased up to 150 bar, about 1.5 GPa on the sample. Then the sample was compressed to about 20 GPa (oil pressure 1600 bar). The sample were kept under target pressure for about 12 hours. After releasing the pressure, white powder was obtained. The rates of the compression were as follows: 4 bar/min from 150 bar to 400 bar, 2 bar/min from 400 bar to 800 bar and 1 bar/min from 800 bar to target oil pressure. The gaskets were removed in the glovebox and colorless solid sample was obtained.

### S1.3 High-pressure single crystal X-ray diffraction experiment

The single crystal X-ray diffraction (XRD) data was collected on an XtaLab Pro X-ray Single Crystal Diffractometer with Mo K<sub>α</sub> X-ray source and HPAD detector. The DAC was loaded on a specific goniometer head. To avoid the influence of the diamond and gasket, diffraction points with intensity higher than 10000 and the diffraction ring around 2.03 Å which belong to the diffraction of iron (gasket) were deleted before indexing.

### S1.4 High-Resolution Gas Chromatography Mass spectrometry experiment

The obtained sample PE-20 was dissolved in 0.5 mL n-hexane (C<sub>16</sub>H<sub>14</sub>, HPLC purity, 99.9%, J. T. Baker). The extracted portion was measured by the High-Resolution Gas Chromatography Mass spectrometry (GC-MS). 1 uL sample was injected automatically in the splitless mode at 280 °C. The GC oven was increased from 40 °C (held for 2 mins) to 280°C (held for 5 mins) at a rate of 5 °C/min. The temperature of the transfer lines and ion source were both set at 280 °C. The system was operated with an electron ionization source (EI) at 70 eV. Scan spectra were recorded in the

range of 50-750 m/z using the full scan mode at 60k resolving power (FWHM at m/z 200) mass resolution. The chemical ionization (CI) source was also utilized in the measurement of the sample PE-20 for identification of the molecular formula. The positive chemical ion mode was applied and methane (99.999%, Beijing AP BAIF Gases Industry Co., Ltd) was used as reagent gas at a flow rate of 1.5 mL/min with a source temperature of 280 °C. The EI and CI of n-hexane were also measured by the same procedure as stated above to act as a blank.

The data were acquired using the Thermo Scientific<sup>TM</sup> TraceFinder<sup>TM</sup> 4.0 software. Data correction was performed by lock-mass corrected during the acquisition using GC column bleed siloxane masses. The mass results were processed by Thermo Scientific deconvolution software and identified by spectral matching using the National Institute of Standards and Technology (NIST). The percentage (%) of each content was calculated by the integrated area of the ion peaks of every compound in respect to that of the total ion peaks.

#### S1.5 Matrix-assisted laser Desorption Ionization Time of Flight Mass Spectrometry experiment

Matrix-assisted laser Desorption Ionization Time of Flight Mass Spectrometry (MALDI-TOF-MS) were recorded on AB Sciex 5800 for the sample PE-20. The test conditions refer to MALDI TOF mass spectra of poly-C<sub>4</sub>H<sub>6</sub> synthesized by nickelocene based catalysts.<sup>5</sup> Samples were dissolved in tetrahydrofuran (THF) (5 mg / cm<sup>-3</sup>) and mixed with matrix solution (2,5-dihydroxobenzoic acid (DHB) with CF<sub>3</sub>COOAg, 1:1 and 5 mmol / cm<sup>-3</sup>). Measurement was taken by using reflector mode in the range of 300-5000 m/z. It should be note that silver (Ag) has two isotopes (Ag<sup>107</sup> and Ag<sup>109</sup>) with approximately equal abundance. Hence, the signal of silver ion clusters (the mass difference in the set = 2) and samples (the mass difference in the set = 1) can be distinguished.

#### S1.6 Density functional theory calculation

Starting with crystal structure obtained from the Rietveld refinement result of in situ XRD experiment at 12.2 GPa, we employed the Density functional theory (DFT) calculation with Vienna Ab initio Simulation Package (VASP) code<sup>6,7</sup> to optimize the crystal structure at 0, 12 and 30 GPa. The projector-augmented plane-wave (PAW) method<sup>8</sup> was used with the local density approximation (LDA) exchange-correlation functional by Ceperley and Alder, as parameterized by Perdew and Zunger (CA-PZ).<sup>9</sup> Plane wave basis with an 540 eV energy cutoff was adopted while k-points solution was better than  $2\pi \times 0.05 \text{ \AA}^{-1}$ . Hydrogen transition reaction was investigated

via variable cell nudged elastic band (vc-NEB) method<sup>10</sup> with the help of USPEX code<sup>11</sup> at 0, 12 and 30 GPa, respectively. To better understand the C-H... $\pi$  interaction, we took two adjacent molecules along x axis as a cluster from the optimized crystal structure and performed calculation in Gaussian software at a B3LYP/6-311G\*\* level.<sup>12</sup> Multifunctional Wavefunction Analyzer (Multiwfn) software was used to further post processing.<sup>13</sup> Interaction region indicator (IRI) calculation was worked out to visualize the interaction between discussed molecules, which was defined as  $IRI(r) = |\nabla\rho(r)|/[\rho(r)]^\alpha$ .<sup>14</sup>  $\alpha$  was set as 1.1 in this case. To measure the aromaticity for the six membered ring, a cluster consisted of two intermediate structures were similarly extracted from solid state structure. Nuclear independent chemical shift (NICS) for three position of the system was calculated in Gaussian (Figure S9).<sup>15</sup> Gauge-Independent Atomic Orbital (GIAO) method<sup>16</sup> was used to carried out magnetic shielding tensor. Non-covalent Interaction in all the calculations above was described by DFT-D3(BJ) correction.<sup>17</sup>

## S2. Supplementary figures and tables

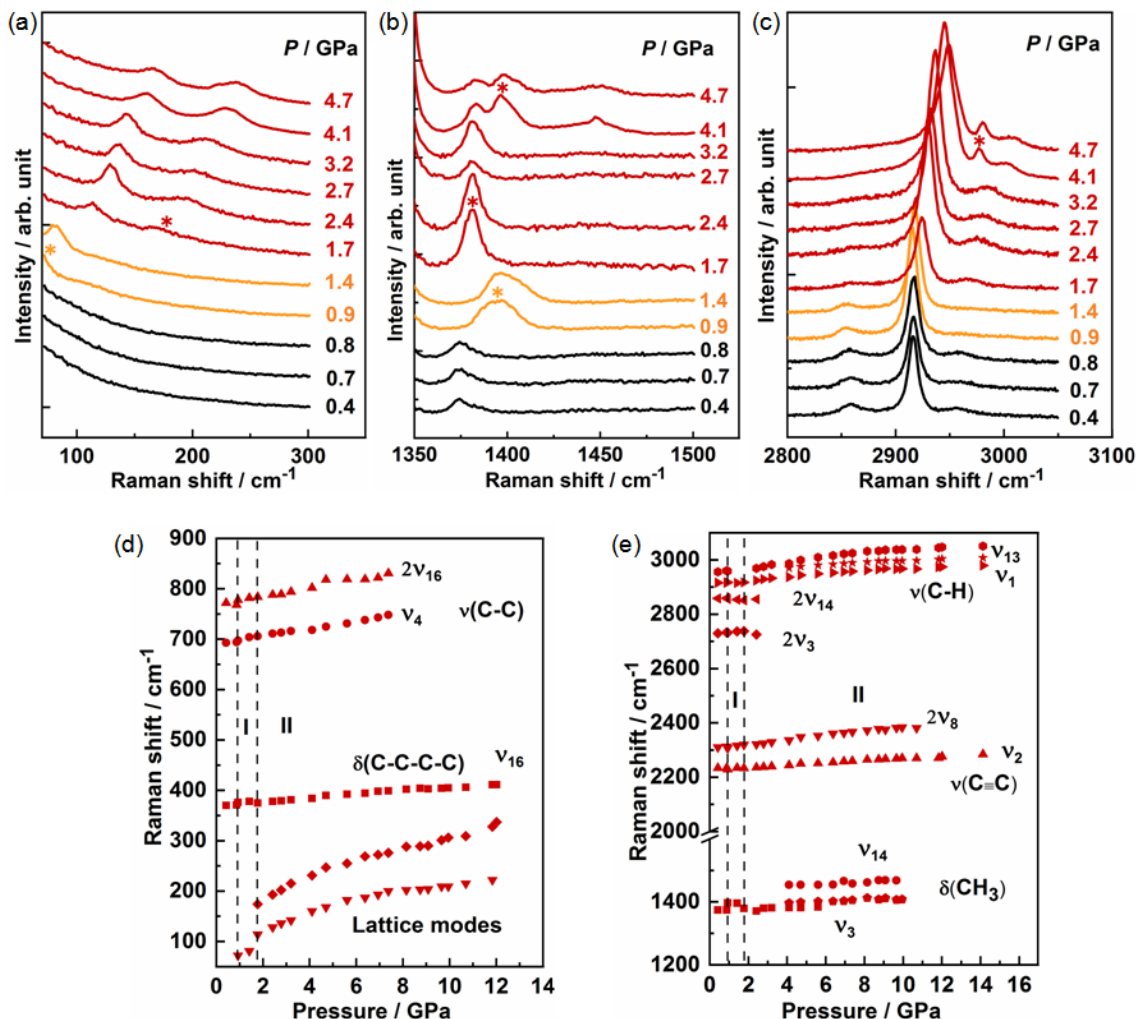

**Figure S1.** Selected Raman spectra of 2-butyne from 0.4 to 4.7 GPa in the range of (a) lattice modes region, (b) 1350-1500 cm<sup>-1</sup> and (c) 2800-3050 cm<sup>-1</sup>. The pressure dependence of Raman shift of 2-butyne in the range of (d) 60-900 cm<sup>-1</sup> and (e) 1200-3100 cm<sup>-1</sup>. I and II stand for phase I and II, respectively. The new peaks are asterisked.

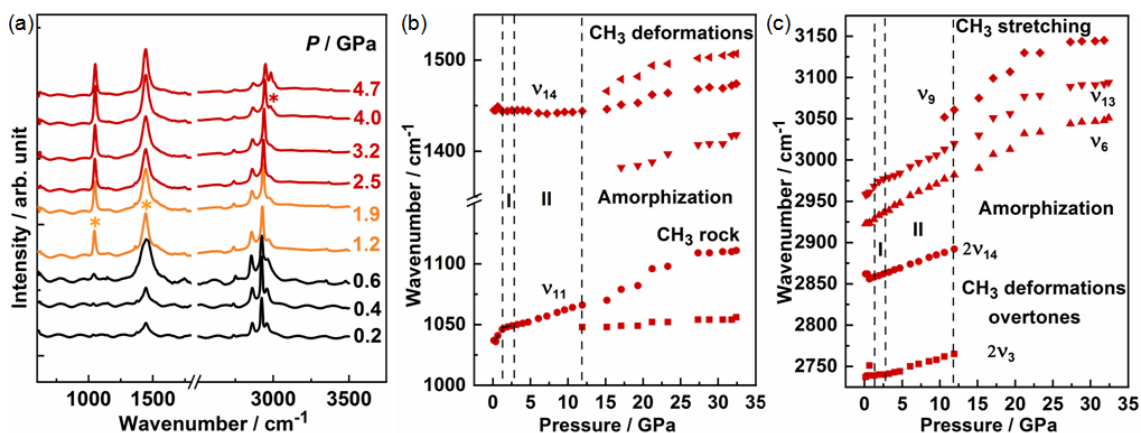

**Figure S2.** (a) Selected IR spectra of 2-butyne from 0.2 to 4.7 GPa; Pressure dependence of IR active modes in the range of (b) 1000-1550  $\text{cm}^{-1}$  and (c) 2725-3175  $\text{cm}^{-1}$ . I and II stand for phase I and II, respectively. The asterisks represent sudden changes in peak intensity or peak profile.

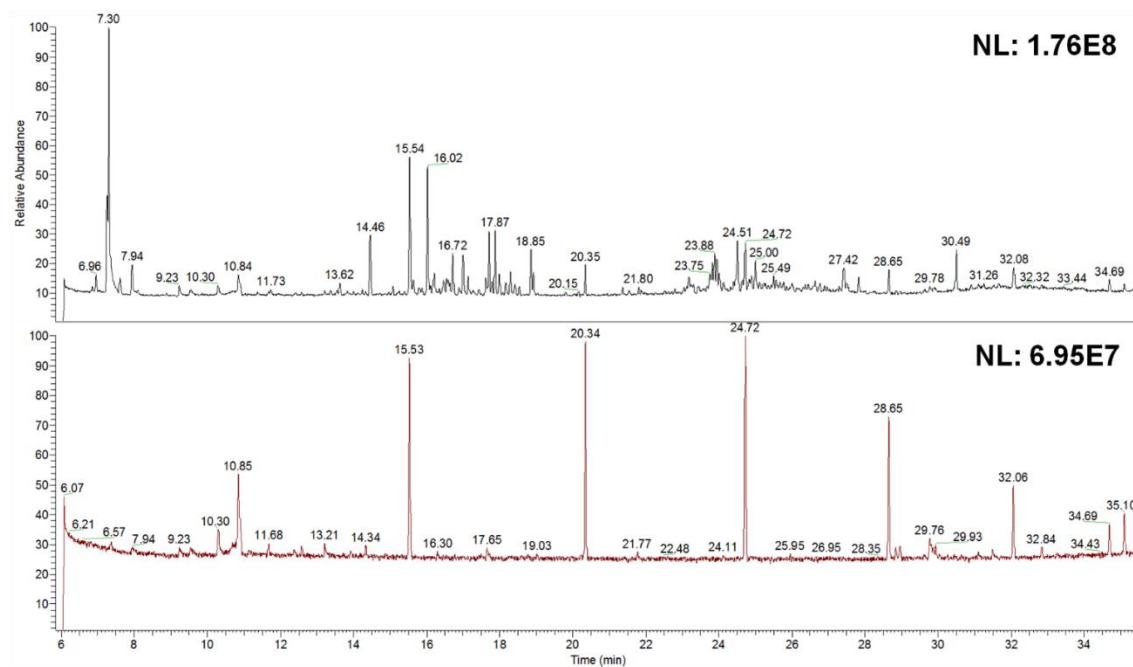

**Figure S3.** Gas Chromatography of soluble molecules from the sample PE-20. The black line is the chromatography of PE-20 sample dissolved in n-hexane and the red line is the standard chromatogram of n-hexane solvents. The mass spectra were collected with EI source.

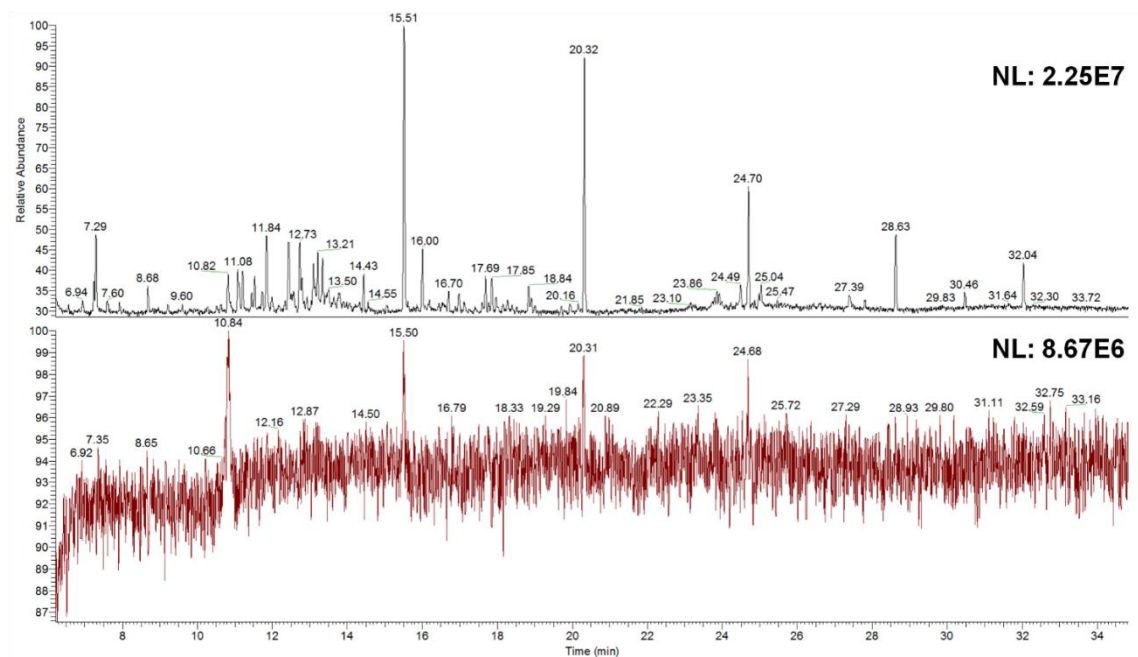

**Figure S4.** Gas Chromatography of soluble molecules from the sample PE-20. The black line is the chromatography of PE-20 sample dissolved in n-hexane and the red line is the standard chromatogram of n-hexane solvents. The mass spectra were collected with CI source.

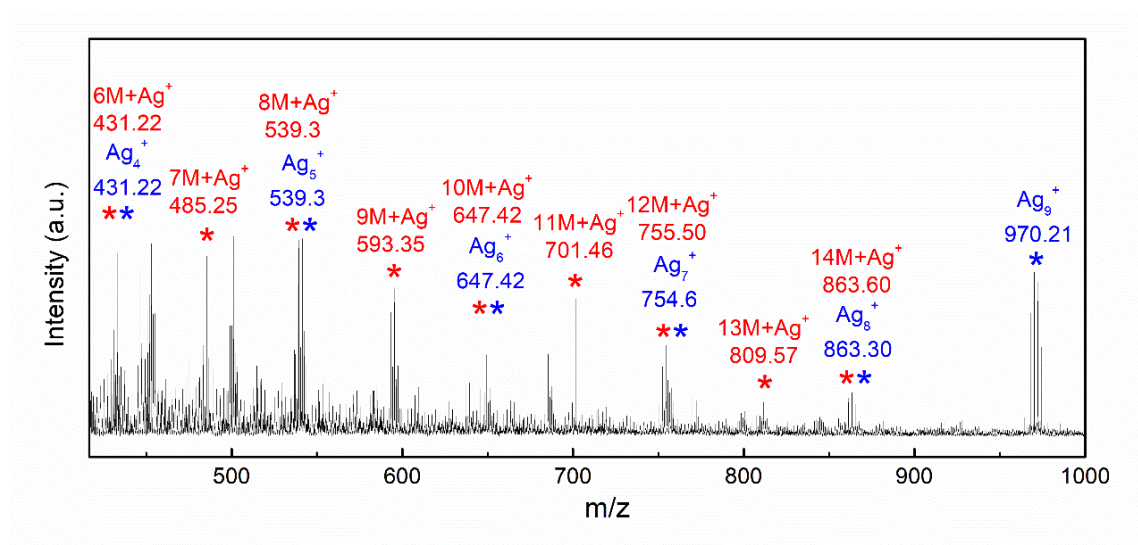

**Figure S5.** Matrix-assisted laser desorption/ionization time of flight mass spectrum (MALDI-TOF-MS) of PE-20. The major peaks are ascribed to silver ion clusters and polymers with one silver ion. Polymers with degree of polymerization from 6 to 14 are detected.



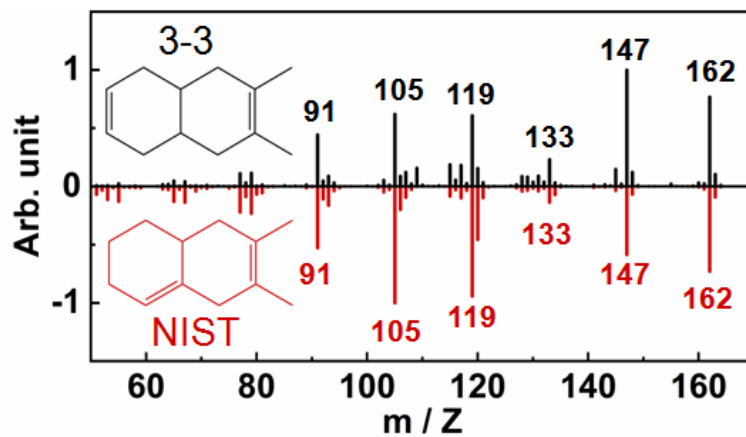

**Figure S6.** The mass spectra of 3-3 comparing with NIST spectra of 6,7-Dimethyl-1,2,3,5,8,8a-hexahydronaphthalene. The mass spectrum of 3-3 is not available in the database, so we use the mass spectra of a similar compound in NIST database for comparison.

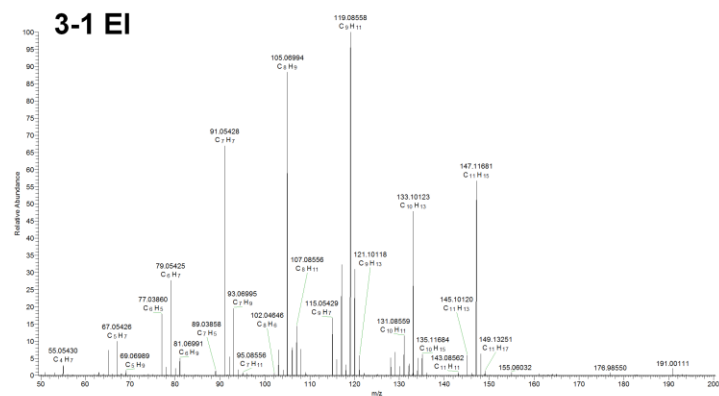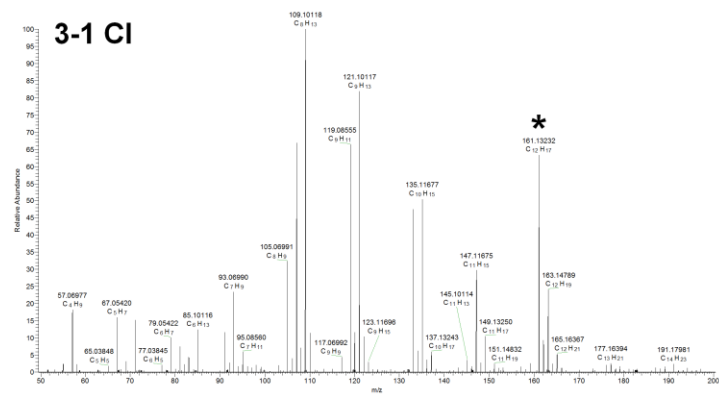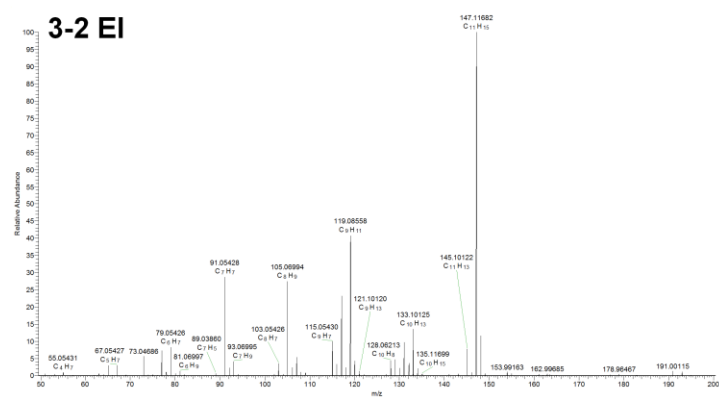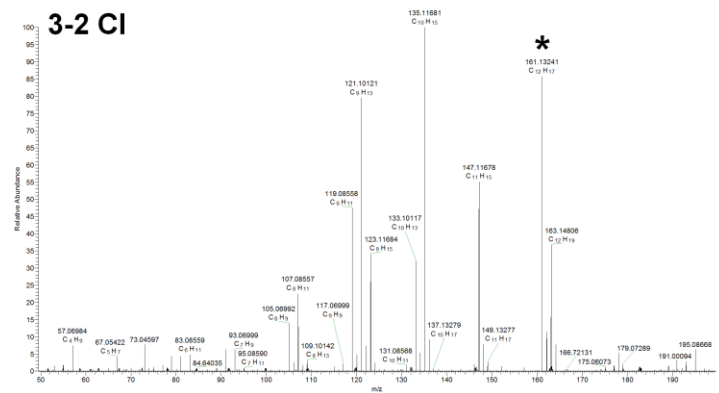

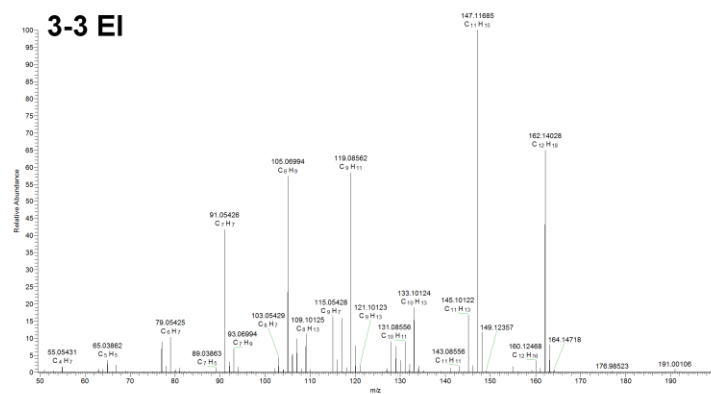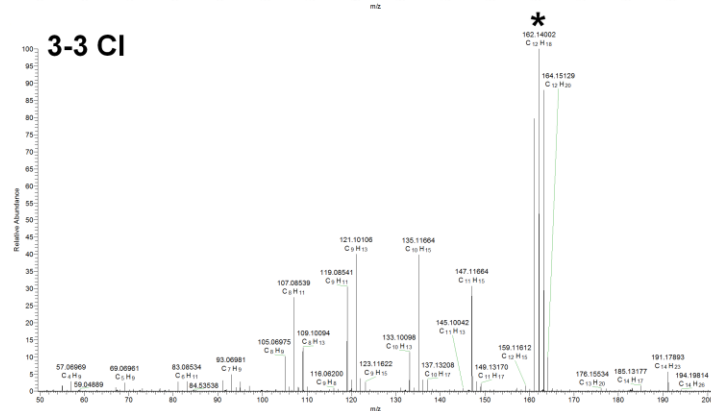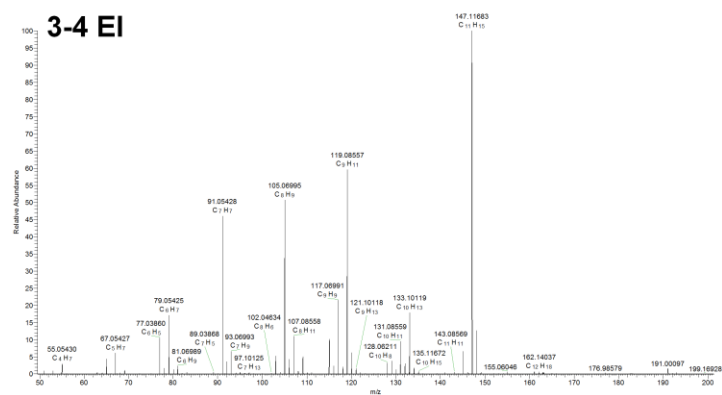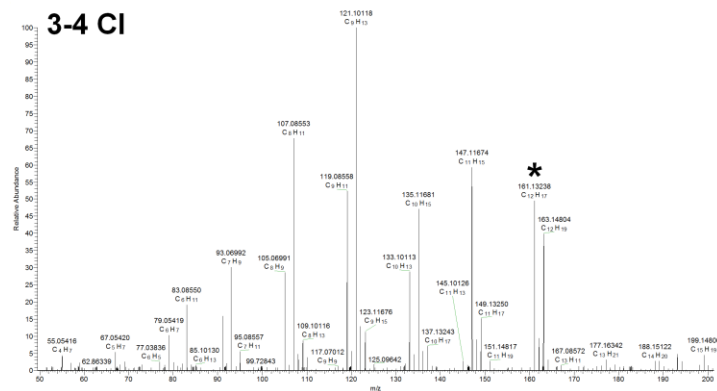

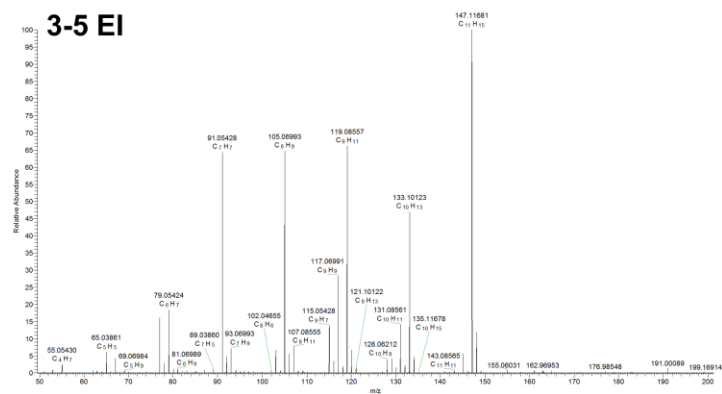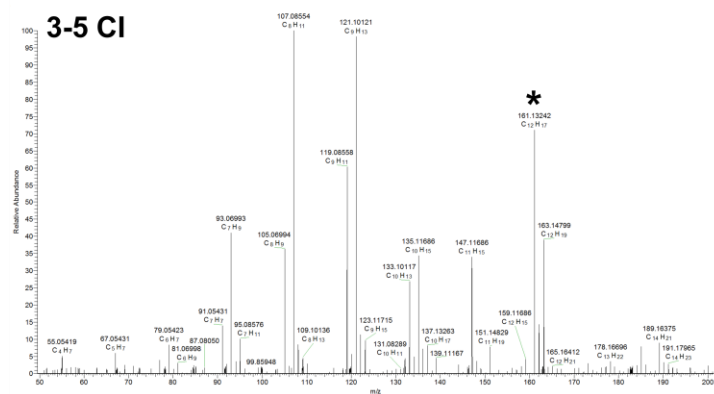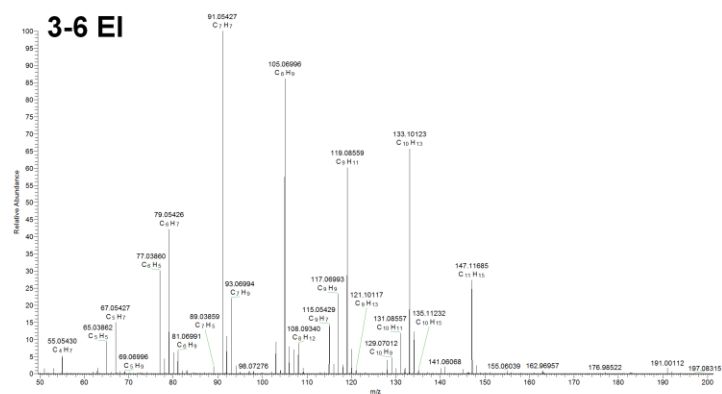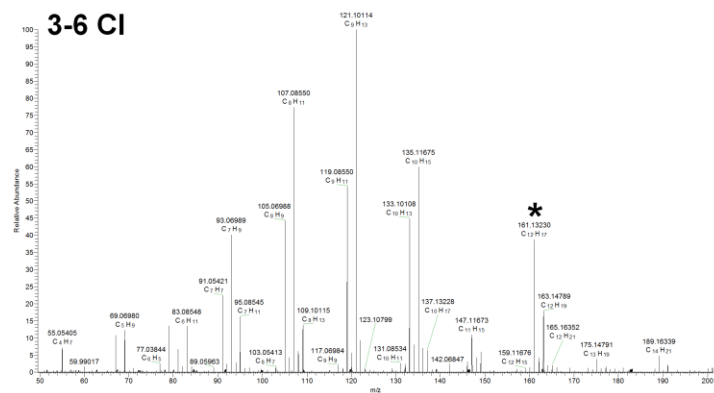

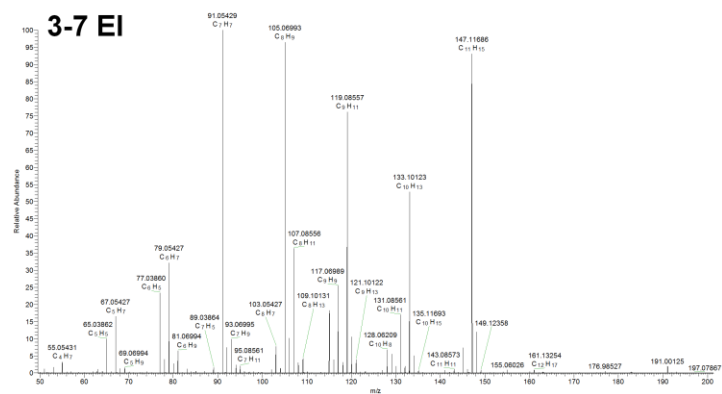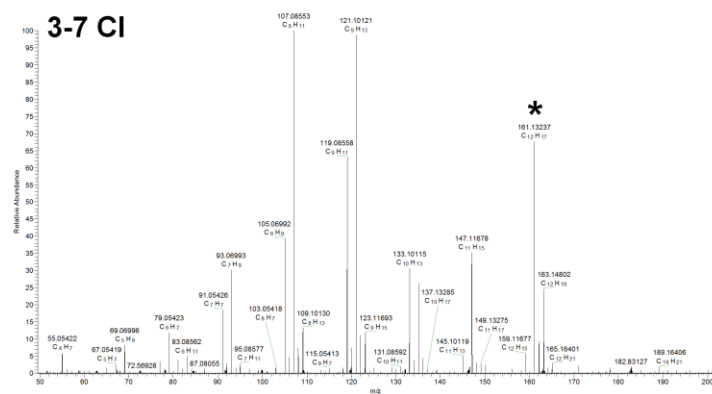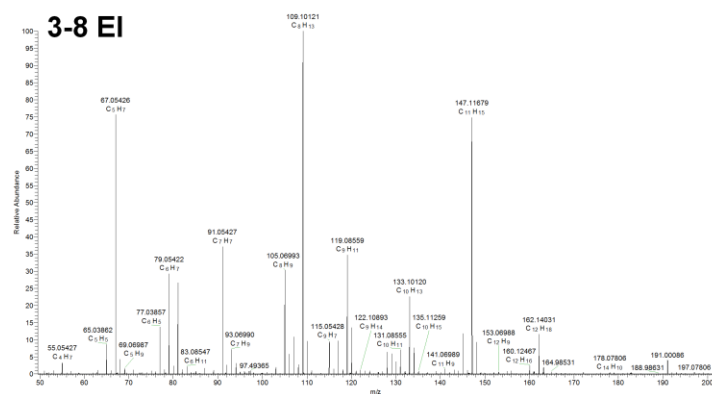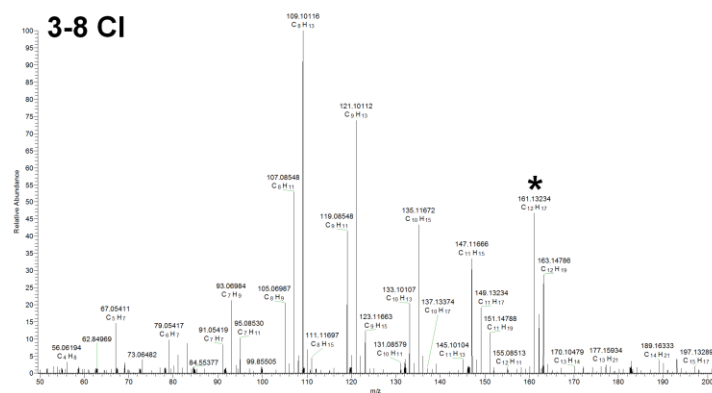

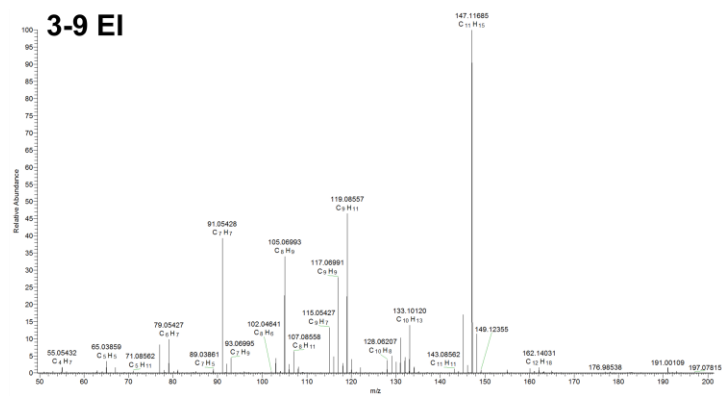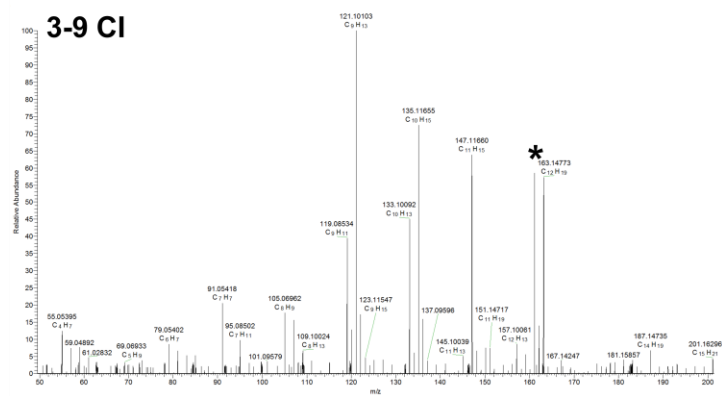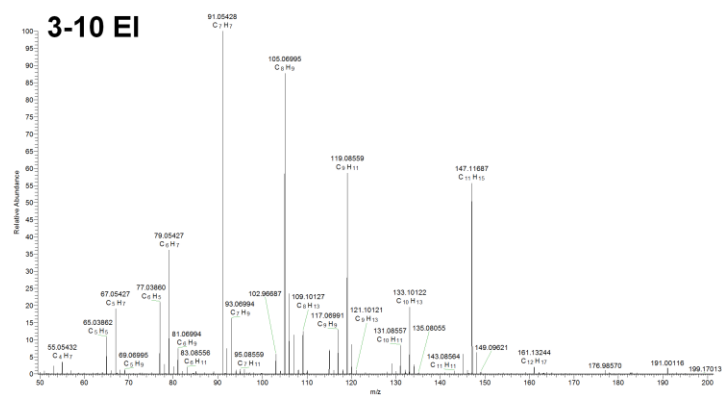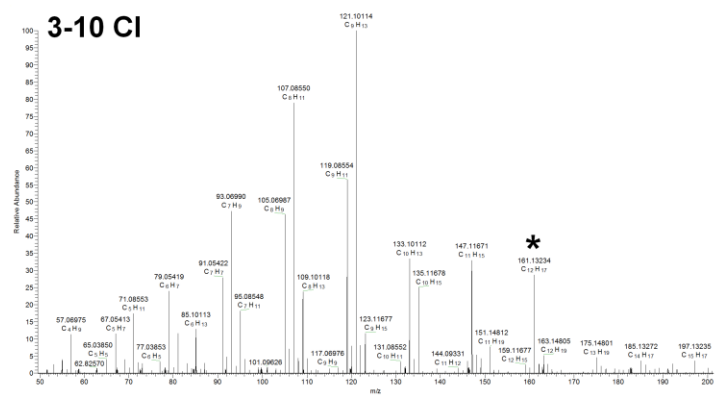

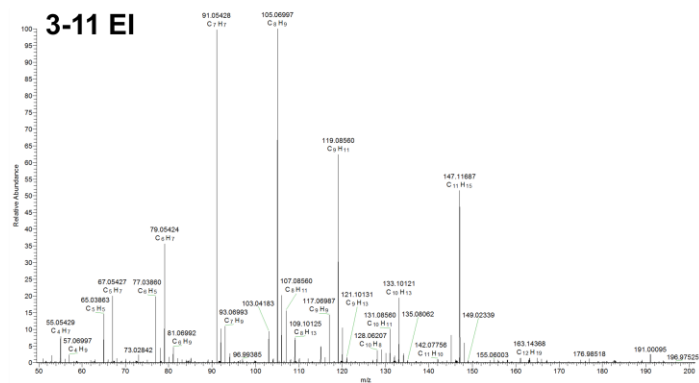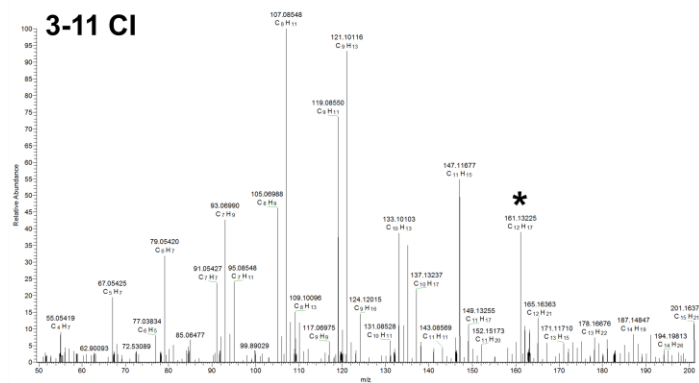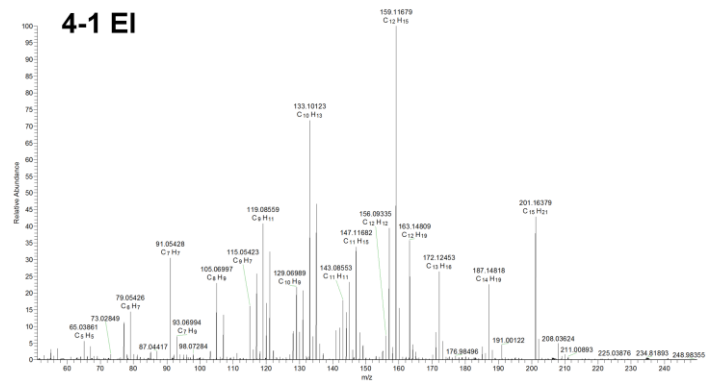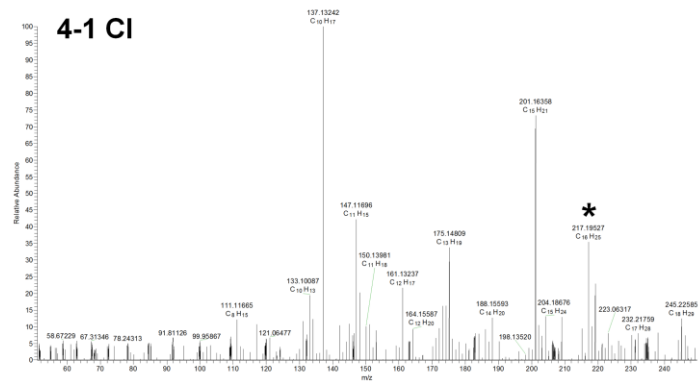

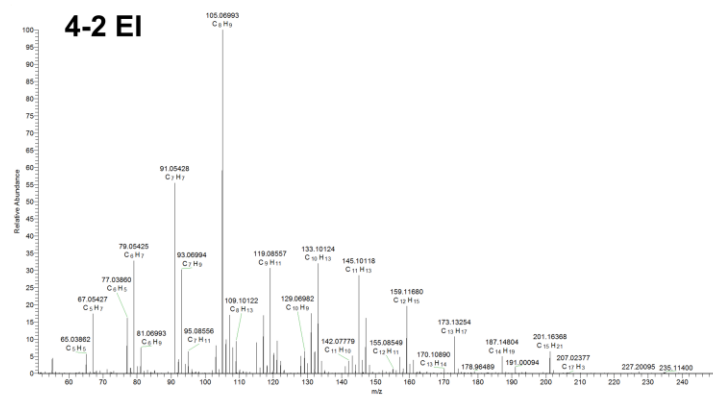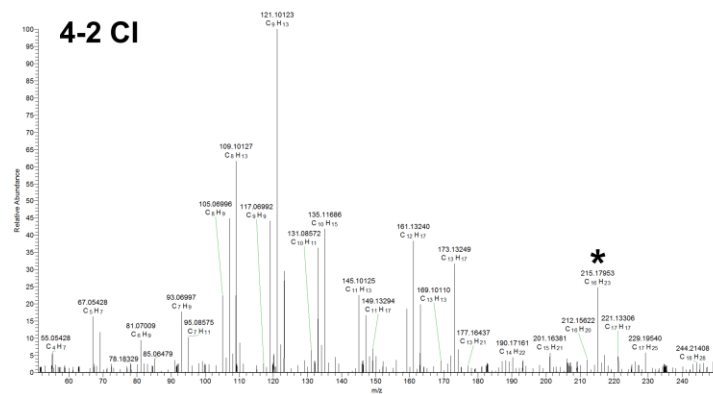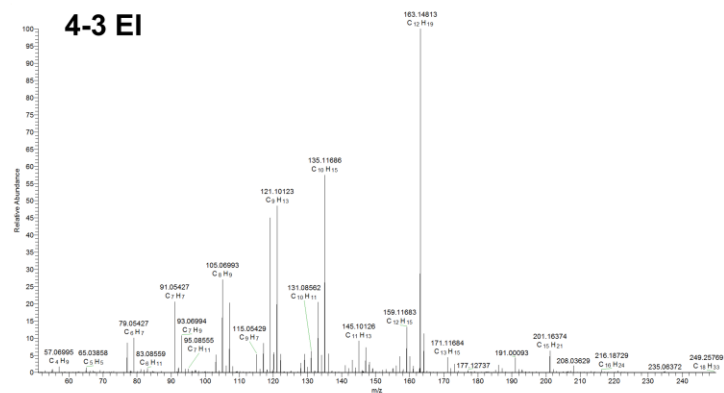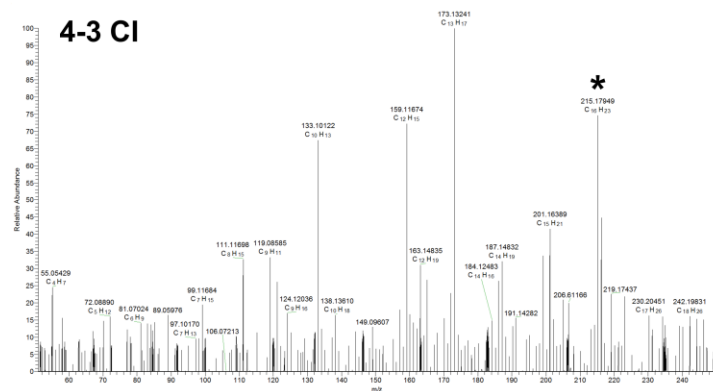



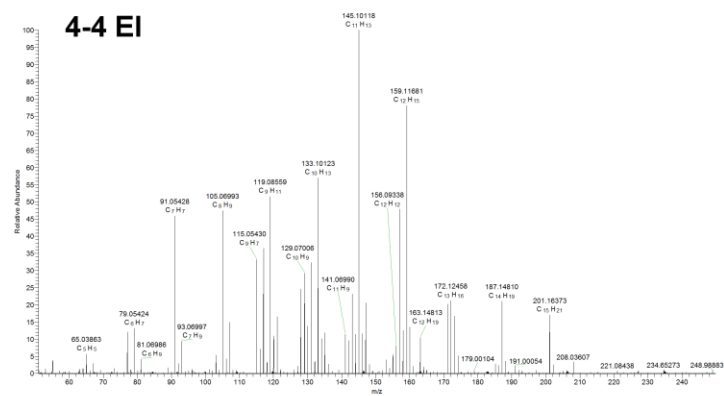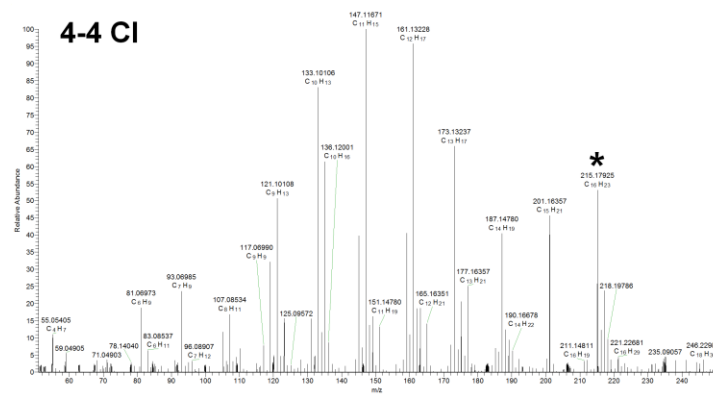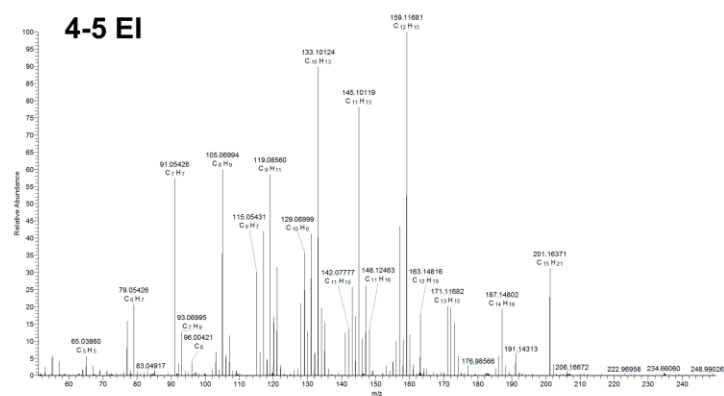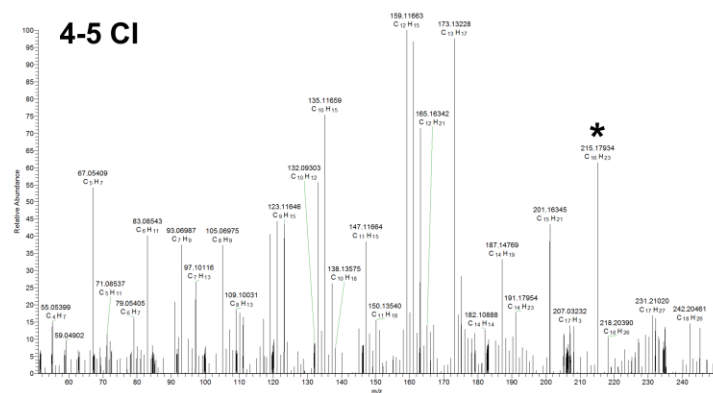

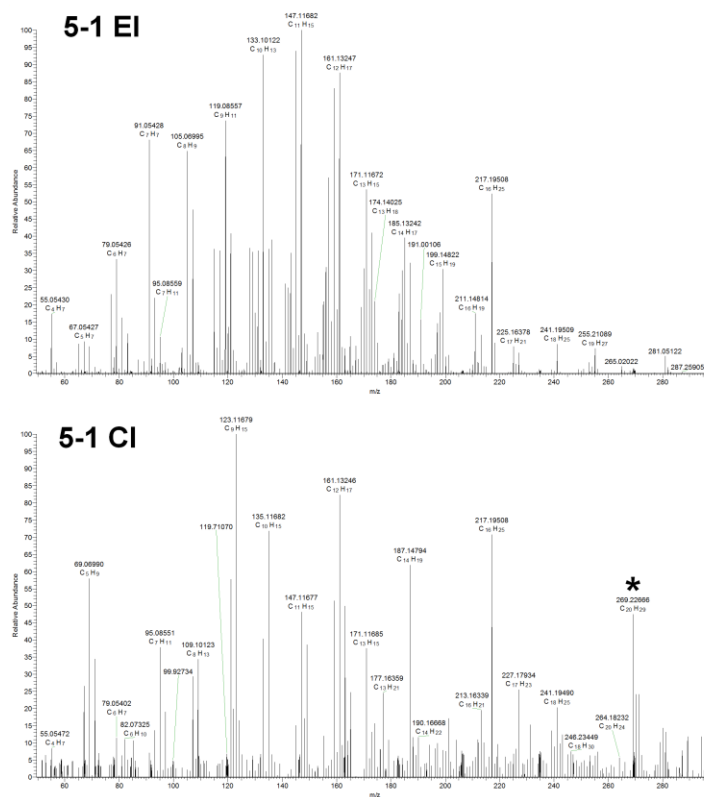

**Figure S7.** Selected high-resolution mass spectra of the sample PE-20 with electron ionization (EI) source and chemical ionization (CI) source. The asterisks stand for the molecular ion peaks of oligomers.

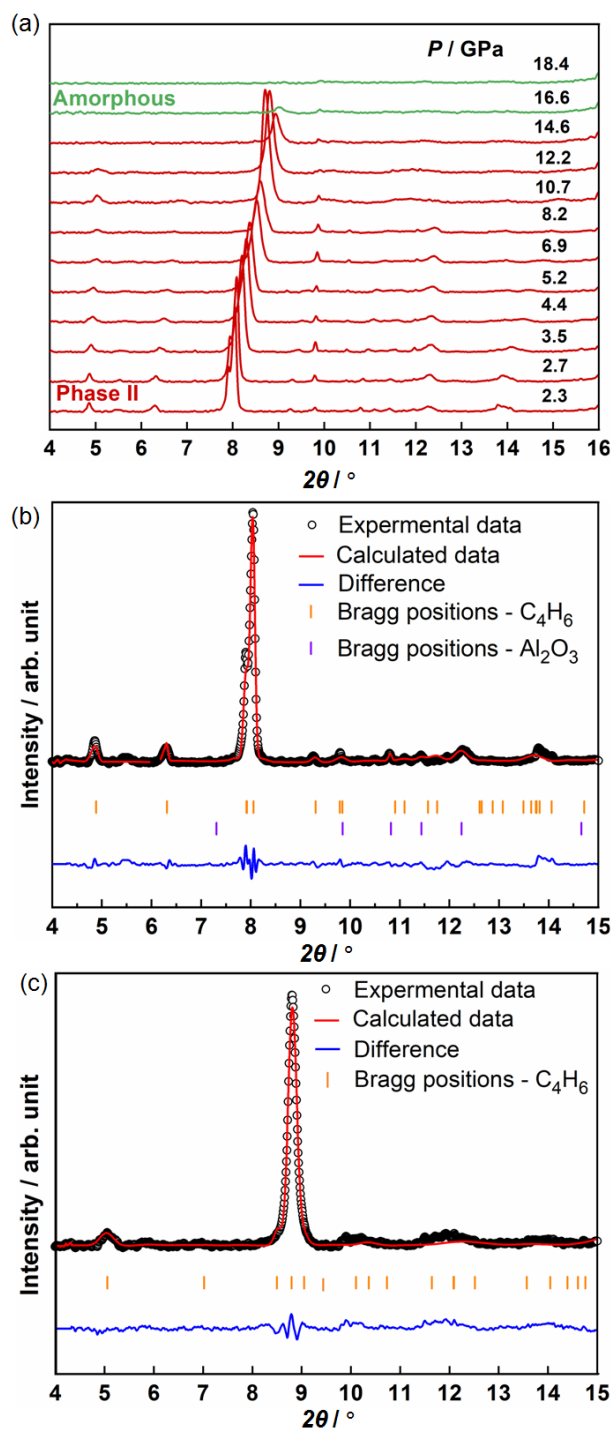

**Figure S8.** (a) In situ powder XRD patterns of 2-butyne from 2.3 to 18.4 GPa. Rietveld refinement plot of 2-butyne at (b) 2.3 GPa and (c) 12.2 GPa. The black circles, solid red line, solid blue line, and the bars represent the experimental data, simulated data, difference, and Bragg positions, respectively.

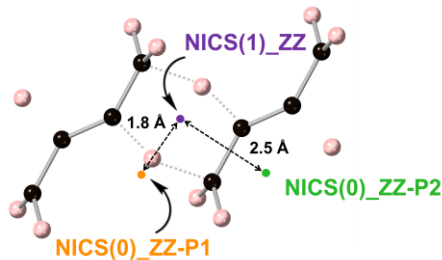

**Figure S9.** The NICS analysis of the 6-member ring intermediate state. The purple dot represents the position at 1 Å above the center of the 6-member ring (NICS(1)\_ZZ). The orange dot stands for the position at 1.8 Å away from the the ring center (NICS(0)\_ZZ-P1), which is located along the extension line between the ring center and the hydrogen atom. The green dot represents the position at 2.5 Å away from the the ring center (NICS(0)\_ZZ-P2).

**Table S1.** Assignment and frequencies of observed Raman and Infrared modes of 2-butyne.

| Assignment              | Raman<br>(4.1 GPa) | Raman<br>(Ref) <sup>18,19</sup> | Infrared<br>(4.7 GPa) | Infrared<br>(Ref) <sup>18,19</sup> | Vibration mode   |
|-------------------------|--------------------|---------------------------------|-----------------------|------------------------------------|------------------|
| R <sub>x</sub>          | 162                | 183                             | -                     | -                                  | -                |
| R <sub>y</sub>          | 230                | 258                             | -                     | -                                  | -                |
| δ(C-C-C-C)              | 384                | 396                             | -                     | -                                  | v <sub>16</sub>  |
| ν(C-C)                  | 717                | 735                             | -                     | -                                  | v <sub>4</sub>   |
| 2δ(C-C-C-C)             | 806                | -                               | -                     | -                                  | 2v <sub>16</sub> |
| ρ(CH <sub>3</sub> rock) | 1047               | 1054                            | 1051                  | 1051                               | v <sub>11</sub>  |
| ρ(CH <sub>3</sub> rock) | 1031               | 1036                            | -                     | -                                  | v <sub>15</sub>  |
| ν(C-C)                  | -                  | -                               | -                     | 1143                               | v <sub>8</sub>   |
| δ(CH <sub>3</sub> )     | 1396               | 1448                            | -                     | -                                  | v <sub>3</sub>   |
| δ(CH <sub>3</sub> )     | 1453               | -                               | 1444                  | 1445                               | v <sub>14</sub>  |
| ν(C≡C)                  | 2254               | 2256                            | -                     | -                                  | v <sub>2</sub>   |
| 2ν(C-C)                 | 2338               | 2356                            | -                     | -                                  | 2v <sub>8</sub>  |
| 2δ(CH <sub>3</sub> )    | -                  | -                               | 2746                  | 2760                               | 2v <sub>3</sub>  |
| 2δ(CH <sub>3</sub> )    | -                  | -                               | 2868                  | 2864                               | 2v <sub>14</sub> |
| ν(C-H)                  | 2945               | 2958                            | -                     | -                                  | v <sub>1</sub>   |
| ν(C-H)                  | -                  | -                               | 2949                  | 2944                               | v <sub>6</sub>   |
| ν(C-H)                  | 2977               | 2989                            | 2984                  | 2981                               | v <sub>13</sub>  |
|                         | 3003               | 3023                            | -                     | -                                  |                  |
| ν(C-H)                  | -                  | -                               | 3006                  | 3003                               | v <sub>9</sub>   |

**Table S2.** Identification of the peaks in the total ion count (TIC) plot of sample PE-20.

| Retention time (min) | Total ions of peaks in TIC | Percent % | Base ions (m/z) | m/z      | Difference ( $\Delta$ ppm) | Formula                                      | Label |
|----------------------|----------------------------|-----------|-----------------|----------|----------------------------|----------------------------------------------|-------|
| 7.25                 | 51572516                   | 8.16%     | 91.0543         | 108.0934 | 0.444                      | C <sub>8</sub> H <sub>12</sub>               | 2-1   |
| 7.30                 | 138353886                  | 21.90%    | 93.0700         | 108.0934 | 0.444                      | C <sub>8</sub> H <sub>12</sub>               | 2-2   |
| 14.46                | 30763821                   | 4.87%     | 119.0856        | 161.1324 | -0.479                     | C <sub>12</sub> H <sub>17</sub> <sup>+</sup> | 3-1   |
| 15.54                | 63121951                   | 9.99%     | 147.1168        | 161.1324 | -0.479                     | C <sub>12</sub> H <sub>17</sub> <sup>+</sup> | 3-2   |
| 16.02                | 68080876                   | 10.78%    | 147.1168        | 162.1403 | -0.013                     | C <sub>12</sub> H <sub>18</sub>              | 3-3   |
| 16.72                | 22082344                   | 3.50%     | 147.1168        | 162.1403 | -0.013                     | C <sub>12</sub> H <sub>18</sub>              | 3-4   |
| 17.00                | 20917786                   | 3.31%     | 147.1168        | 161.1324 | -0.479                     | C <sub>12</sub> H <sub>17</sub> <sup>+</sup> | 3-5   |
| 17.71                | 33294476                   | 5.27%     | 91.0543         | 161.1324 | -0.479                     | C <sub>12</sub> H <sub>17</sub> <sup>+</sup> | 3-6   |
| 17.87                | 34819435                   | 5.51%     | 91.0543         | 161.1325 | 0.023                      | C <sub>12</sub> H <sub>17</sub> <sup>+</sup> | 3-7   |
| 17.99                | 10247112                   | 1.62%     | 109.1012        | 162.1403 | -0.013                     | C <sub>12</sub> H <sub>18</sub>              | 3-8   |
| 18.29                | 12686992                   | 2.01%     | 147.1168        | 162.1403 | -0.013                     | C <sub>12</sub> H <sub>18</sub>              | 3-9   |
| 18.85                | 24601944                   | 3.89%     | 91.0543         | 161.1325 | 0.023                      | C <sub>12</sub> H <sub>17</sub> <sup>+</sup> | 3-10  |
| 18.92                | 12351425                   | 1.96%     | 105.0699        | 161.1325 | 0.023                      | C <sub>12</sub> H <sub>17</sub> <sup>+</sup> | 3-11  |
| 23.82                | 13508694                   | 2.14%     | 159.1168        | 216.1874 | 0.148                      | C <sub>16</sub> H <sub>24</sub>              | 4-1   |
| 23.88                | 19328778                   | 3.06%     | 105.0700        | 216.1874 | 0.148                      | C <sub>16</sub> H <sub>24</sub>              | 4-2   |
| 23.94                | 16208115                   | 2.57%     | 163.1481        | 216.1873 | 0.048                      | C <sub>16</sub> H <sub>24</sub>              | 4-3   |
| 24.51                | 23759731                   | 3.76%     | 91.0543         | 216.1871 | -0.152                     | C <sub>16</sub> H <sub>24</sub>              | 4-4   |
| 25.00                | 14223509                   | 2.25%     | 159.1168        | 216.1873 | 0.048                      | C <sub>16</sub> H <sub>24</sub>              | 4-5   |
| 30.49                | 21817072                   | 3.45%     | 147.1167        | 270.2333 | -0.902                     | C <sub>20</sub> H <sub>30</sub>              | 5-1   |

**Table S3.** Comparison of cell parameters between high-pressure phases and low-temperature phases.

|                | High-pressure phases<br>(single crystal XRD results) |                       | Low-temperature phases <sup>20,21</sup> |                   |
|----------------|------------------------------------------------------|-----------------------|-----------------------------------------|-------------------|
|                | Phase I<br>(1.2 GPa)                                 | Phase II<br>(1.8 GPa) | Phase I<br>(220 K)                      | Phase II<br>(5 K) |
| Space group    | <i>P4<sub>2</sub>/mnm</i>                            | <i>C2/m</i>           | <i>P4<sub>2</sub>/mnm</i>               | <i>C2/m</i>       |
| <i>a</i> (Å)   | 5.40(3)                                              | 5.22(5)               | 5.42                                    | 7.16              |
| <i>b</i> (Å)   | 5.41(4)                                              | 7.189(8)              | 5.42                                    | 6.46              |
| <i>c</i> (Å)   | 6.95(11)                                             | 5.25(5)               | 6.89                                    | 4.08              |
| $\alpha^\circ$ | 90                                                   | 90                    | 90                                      | 90                |
| $\beta^\circ$  | 90                                                   | 91(1)                 | 90                                      | 101.05            |
| $\gamma^\circ$ | 90                                                   | 90                    | 90                                      | 90                |

**Table S4.** Selected Result of Rietveld refinement of the C<sub>4</sub>H<sub>6</sub> structure under external pressure.

| Pressure                 | 2.3 GPa (Phase II)     | 12.2 GPa (Phase II)   |
|--------------------------|------------------------|-----------------------|
| Space group              | <i>C2/m</i>            |                       |
| <i>a</i> (Å)             | 5.046(4)               | 4.599(2)              |
| <i>b</i> (Å)             | 6.287(3)               | 5.5283(4)             |
| <i>c</i> (Å)             | 5.079(2)               | 4.982(3)              |
| $\beta^\circ$            | 91.18(9)               | 92.69(6)              |
| Volume (Å <sup>3</sup> ) | 161.11                 | 126.54                |
| Density (g/cm)           | 1.11                   | 1.42                  |
| Z                        | 2                      |                       |
| u(C)                     | 0.0317 (fixed)         |                       |
| C1                       | 0.0884(8) 0 0.0808(6)  | 0.1085(2) 0 0.0721(2) |
| C2                       | 0.3026(12) 0 0.2745(6) | 0.3696(6) 0 0.2462(3) |
| R <sub>p</sub>           | 0.0919                 | 0.0896                |
| R <sub>wp</sub>          | 0.1269                 | 0.1136                |

**Table S5.** NICS indexs in the 6-member ring intermediate state of hydrogen transfer.

| Pressure / GPa | NICS(1)_ZZ /<br>ppm | NICS(0)_ZZ-P1 /<br>ppm | NICS(0)_ZZ-P2 /<br>ppm |
|----------------|---------------------|------------------------|------------------------|
| 0              | -15.69              | 4.50                   | 2.36                   |
| 12             | -23.77              | 6.01                   | 1.09                   |
| 30             | -24.26              | 6.46                   | 6.83                   |

### S3. Supplemental references

- (1) Mao, H.-k.; Xu, J.; Bell, P. M. Calibration of the ruby pressure gauge to 800 kbar under quasi-hydrostatic conditions, *J. Geophys. Res.* **1986**, *91*, 4673-4676.
- (2) Prescher, C.; Prakapenka, V.B. DIOPTAS: a program for reduction of two-dimensional X-ray diffraction data and data exploration. *High Pressure Res.* **2015**, *35*, 285-288.
- (3) Petricek, V.; Dusek, M.; Palatinus, L. Crystallographic computing system JANA2006: general features. *Z. Kristallogr.* **2014**, *229*, 345-352.
- (4) Salmon, P. S.; Drewitt, J. W. E.; Whittaker, D. A. J.; Zeidler, A.; Wezka, K.; Bull, C. L.; Tucker, M. G. M.; Wilding, C.; Guthrie, M.; Marrocchelli, D. Density-driven structural transformations in network forming glasses: a high-pressure neutron diffraction study of GeO<sub>2</sub> glass up to 17.5 GPa. *J. Phys.: Condens. Matter* **2012**, *24*, 415102.
- (5) Pasynkiewicz, S.; Oledzka, E.; Pietrzykowski, A. Polymerization of alkynes on nickelocene based catalysts: considerations on polymerization mechanism. *J. Mol. Catal. A: Chem.* **2004**, *224*, 117-124.
- (6) Kresse, G.; Furthmüller, J. Efficiency of ab-initio total energy calculations for metals and semiconductors using a plane-wave basis set. *Comput. Mater. Sci.* **1996**, *6*, 15-50.
- (7) Kresse, G.; Furthmüller, J. Efficient iterative schemes for *ab initio* total-energy calculations using a plane-wave basis set. *Phys. Rev. B* **1996**, *54*, 11169.
- (8) Kresse, G.; Joubert, D. From ultrasoft pseudopotentials to the projector augmented-wave method. *Phys. Rev. B* **1999**, *59*, 1758-1775.
- (9) Perdew, J. P.; Zunger, A. Self-interaction correction to density-functional approximations for many-electron systems. *Phys. Rev. B* **1981**, *23*, 5048-5079.
- (10) Qian, G.-R.; Dong, X.; Zhou, X.-F.; Tian, Y.; Oganov, A. R.; Wang, H.-T. Variable cell nudged elastic band method for studying solid-solid structural phase transitions. *Comput. Phys. Commun.* **2013**, *184*, 2111-2118.
- (11) Glass, C. W.; Oganov, A. R.; Hansen, N. USPEX-Evolutionary crystal structure prediction. *Comput. Phys. Commun.* **2006**, *175*, 713-720.
- (12) Frisch, M. J.; Trucks, G. W.; Schlegel, H. B. et al. GAUSSIAN 09, Gaussian, Inc., Wallingford CT, 2009.
- (13) Lu, T.; Chen, F. Multiwfn: A multifunctional wavefunction analyzer. *J. Comput. Chem.* **2012**, *33*, 580-592.
- (14) Lu, T.; Chen, Q. Interaction region indicator: a simple real space function clearly revealing both chemical bonds and weak interactions. *Chemistry-Methods* **2021**, *1*, 231-239.
- (15) Fallah-Bagher-Shaidei, H.; Wannere, C. S.; Corminboeuf, C.; Puchta, R.; Schleyer, P. v. R. Which NICS aromaticity index for planar  $\pi$  rings is best? *Org. Lett.* **2006**, *8*, 863-866.



- (16) Wolinski, K.; Hinton, J. F.; Pulay, P. Efficient implementation of the gauge-independent atomic orbital method for NMR chemical shift calculations. *J. Am. Chem. Soc.* **1990**, *112*, 8251-8260.
- (17) Grimme, S.; Ehrlich, S.; Goerigk, L. Effect of the damping function in dispersion corrected density functional theory. *J. Comput. Chem.* **2011**, *32*, 1456-1465.
- (18) Baonza, V. G.; Montoro, O. R.; Taravillo, M.; Cáceres, M.; Núñez, J. Phase transitions and hindered rotation in dimethylacetylene at high pressures probed by Raman spectroscopy. *J. Chem. Phys.* **2004**, *121*, 11156-11162.
- (19) Guan, J.; Daljeet, R.; Kieran, A.; Song, Y. Pressure-induced amorphization and reactivity of solid dimethyl acetylene probed by in situ FTIR and Raman spectroscopy. *J. Phys.: Condes. Matter* **2018**, *30*, 224004.
- (20) Pionataro, E.; Post, B. The crystal structure of dimethyl acetylene at -50 °C. *J. Acta Crysta.* **1955**, *8*, 672-674.
- (21) Ibberson, R. M.; Prager, M. The *ab initio* crystal-structure determination of perdeuterodimethylacetylene by high-resolution neutron powder diffraction. *Acta Crystallogr., Sect. B: Struct. Sci.* **1995**, *B51*, 71-76.
